# Supplementary material for: Effects of Pre-Treatment Using Plasma on the Antibacterial Activity of Mushroom Surfaces
Source: Foods. 2021 Aug 15;10(8):1888. doi: 10.3390/foods10081888 (PMC8394274; doi:10.3390/foods10081888)
Supplement: Supplementary file 1 [file foods-10-01888-s001.zip › Supplementary Table S1.xlsx]

## Sheet: Fig.2a NTAPPJ
Supplementary Table S1. Statistical analysis for data in figures 2, 6, and 8.
antimicrobial test - NTAPPJ treatment
Exp	treatment time	dilution		CFU	ori number	average	std deviation	log10 cfu	log average	log stdev	relative CFU	log avg	log stdev	relative CFU avg	relative CFU stdev
1	control	10^6*10	rep 1	68	680000000	6.06667e+08	8.73689e+07	8.83251	8.77981	0.0647194	1	8.54249	0.248689	1	0
			rep 2	63	630000000			8.79934
			rep 3	51	510000000			8.70757
	10 mint	10^7	rep 1	29	290000000	290000000	20000000	8.4624	8.46171	0.0300049	0.478022	8.16561	0.269041	0.436184	0.119479
			rep 2	31	310000000			8.49136
			rep 3	27	270000000			8.43136
	15 mint	10^7	rep 1	16	160000000	1.13333e+08	4.04145e+07	8.20412	8.03754	0.144267	0.186813	7.86956	0.232961	0.247925	0.126641
			rep 2	9	90000000			7.95424
			rep 3	9	90000000			7.95424
	20 mint	10^7	rep 1	11	110000000	100000000	10000000	8.04139	7.99855	0.0435933	0.164835	7.80921	0.160616	0.215513	0.147685
			rep 2	10	100000000			8
			rep 3	9	90000000			7.95424
2	control	10^6*10	rep 1	30	300000000	360000000	8.7178e+07	8.47712	8.54834	0.100072	1
			rep 2	46	460000000			8.66276
			rep 3	32	320000000			8.50515
	10 mint	10^7	rep 1	6	60000000	9.33333e+07	3.05505e+07	7.77815	7.95244	0.156048	0.259259
			rep 2	12	120000000			8.07918
			rep 3	10	100000000			8
	15 mint	10^7	rep 1	5	50000000	7.66667e+07	2.51661e+07	7.69897	7.86735	0.153664	0.212963
			rep 2	8	80000000			7.90309
			rep 3	10	100000000			8
	20 mint	10^7	rep 1	7	70000000	5.33333e+07	1.52753e+07	7.8451	7.71538	0.122347	0.148148
			rep 2	5	50000000			7.69897
			rep 3	4	40000000			7.60206
3	control	10^6*10	rep 1	54	540000000	4.66667e+08	6.4291e+07	8.73239	8.66637	0.0580678	1
			rep 2	44	440000000			8.64345
			rep 3	42	420000000			8.62325
	10 mint	10^7	rep 1	20	200000000	2.26667e+08	3.78594e+07	8.30103	8.35154	0.0699385	0.485714
			rep 2	21	210000000			8.32222
			rep 3	27	270000000			8.43136
	15 mint	10^7	rep 1	4	40000000	7.33333e+07	2.88675e+07	7.60206	7.83685	0.203333	0.157143
			rep 2	9	90000000			7.95424
			rep 3	9	90000000			7.95424
	20 mint	10^7	rep 1	7	70000000	5.33333e+07	2.08167e+07	7.8451	7.70012	0.196005	0.114286
			rep 2	3	30000000			7.47712
			rep 3	6	60000000			7.77815
4	control	10^6*10	rep 1	20	200000000	1.53333e+08	4.16333e+07	8.30103	8.17545	0.113793	1
			rep 2	14	140000000			8.14613
			rep 3	12	120000000			8.07918
	10 mint	10^7	rep 1	10	100000000	80000000	1.73205e+07	8	7.89673	0.0894327	0.521739
			rep 2	7	70000000			7.8451
			rep 3	7	70000000			7.8451
	15 mint	10^7	rep 1	9	90000000	6.66667e+07	4.04145e+07	7.95424	7.73651	0.377132	0.434783
			rep 2	2	20000000			7.30103
			rep 3	9	90000000			7.95424
	20 mint	10^7	rep 1	6	60000000	6.66667e+07	5.7735e+06	7.77815	7.82278	0.0386517	0.434783
			rep 2	7	70000000			7.8451
			rep 3	7	70000000			7.8451
ANOVA summary
F	24.72
P value	<0.0001
P value summary	****
Significant diff. among means (P < 0.05)?	Yes
R squared	0.6276
Brown-Forsythe test
F (DFn, DFd)	13.17 (3, 44)
P value	<0.0001
P value summary	****
Are SDs significantly different (P < 0.05)?	Yes
Bartlett's test
Bartlett's statistic (corrected)	45.88
P value	<0.0001
P value summary	****
Are SDs significantly different (P < 0.05)?	Yes
ANOVA table	SS	DF	MS	F (DFn, DFd)	P value
Treatment (between columns)	8.277e+17	3	2.759e+17	F (3, 44) = 24.72	P<0.0001
Residual (within columns)	4.911e+17	44	1.116e+16
Total	1.319e+18	47
Data summary
Number of treatments (columns)	4
Number of values (total)	48
Number of families	1
Number of comparisons per family	6
Alpha	0.05
Tukey's multiple comparisons test	Mean Diff.	95.00% CI of diff.	Below threshold?	Summary
control vs. 10 minute	224166667	109010336 to 339322997	Yes	****		A-B
control vs. 15 minute	314166667	199010336 to 429322997	Yes	****		A-C
control vs. 20 minute	328333333	213177003 to 443489664	Yes	****		A-D
10 minute vs. 15 minute	90000000	-25156330 to 205156330	No	ns		B-C
10 minute vs. 20 minute	104166667	-10989664 to 219322997	No	ns		B-D
15 minute vs. 20 minute	14166667	-100989664 to 129322997	No	ns		C-D
Test details	Mean 1	Mean 2	Mean Diff.	SE of diff.	n1	n2	q	DF
control vs. 10 minute	396666667	172500000	224166667	43129620	12	12	7.35	44
control vs. 15 minute	396666667	82500000	314166667	43129620	12	12	10.3	44
control vs. 20 minute	396666667	68333333	328333333	43129620	12	12	10.77	44
10 minute vs. 15 minute	172500000	82500000	90000000	43129620	12	12	2.951	44
10 minute vs. 20 minute	172500000	68333333	104166667	43129620	12	12	3.416	44
15 minute vs. 20 minute	82500000	68333333	14166667	43129620	12	12	0.4645	44

## Sheet: Fig.2b PTW
antimicrobial test - PTW treatment
Exp	treatment time	dilution		CFU	ori number	average	std deviation	log10 cfu	log average	log stdev	relative CFU	log avg	log stdev	relative CFU avg	relative CFU stdev
exp 1	control	10^7	rep 1	68	680000000	700000000	8.18535e+07	8.83251	8.84316	0.0500013	1	8.87801	0.111006	1	0
			rep 2	79	790000000			8.89763
			rep 3	63	630000000			8.79934
	10 mint	10^7	rep 1	23	230000000	320000000	8.544e+07	8.36173	8.4941	0.122012	0.457143	8.66382	0.226417	0.637596	0.214671
			rep 2	33	330000000			8.51851
			rep 3	40	400000000			8.60206
	15 mint	10^7	rep 1	7	70000000	8.66667e+07	2.08167e+07	7.8451	7.92986	0.377132	0.12381	8.22242	0.40594	0.284031	0.250223
			rep 2	8	80000000			7.90309
			rep 3	11	110000000			8.04139
	20 mint	10^7	rep 1	5	50000000	70000000	2.64575e+07	7.69897	7.82571	0.156048	0.1	8.06315	0.362175	0.18281	0.132414
			rep 2	6	60000000			7.77815
			rep 3	10	100000000			8
exp 2	control	10^7	rep 1	51	510000000	620000000	1.05357e+08	8.70757	8.78808	0.0755134	1
			rep 2	63	630000000			8.79934
			rep 3	72	720000000			8.85733
	10 mint	10^7	rep 1	41	410000000	360000000	6.245e+07	8.61278	8.55166	0.0790404	0.580645
			rep 2	38	380000000			8.57978
			rep 3	29	290000000			8.4624
	15 mint	10^7	rep 1	10	100000000	9.66667e+07	5.7735e+06	8	7.98475	0.377132	0.155914
			rep 2	9	90000000			7.95424
			rep 3	10	100000000			8
	20 mint	10^7	rep 1	6	60000000	70000000	1.73205e+07	7.77815	7.83685	0.101666	0.112903
			rep 2	6	60000000			7.77815
			rep 3	9	90000000			7.95424
exp 3	control	10^7	rep 1	118	1180000000	1.01333e+09	1.47422e+08	9.07188	9.0028	0.0614475	1
			rep 2	96	960000000			8.98227
			rep 3	90	900000000			8.95424
	10 mint	10^7	rep 1	100	1000000000	8.86667e+08	1.05987e+08	9	8.94572	0.051467	0.875
			rep 2	87	870000000			8.93952
			rep 3	79	790000000			8.89763
	15 mint	10^7	rep 1	49	490000000	580000000	1.64621e+08	8.6902	8.75264	0.377132	0.572368
			rep 2	48	480000000			8.68124
			rep 3	77	770000000			8.88649
	20 mint	10^7	rep 1	40	400000000	340000000	60000000	8.60206	8.5269	0.0775525	0.335526
			rep 2	34	340000000			8.53148
			rep 3	28	280000000			8.44716
One-way analysis of variance
P value	< 0.0001
P value summary	***
Are means signif. different? (P < 0.05)	Yes
Number of groups	4
F	13.4
R square	0.5568
Bartlett's test for equal variances
Bartlett's statistic (corrected)	3.989
P value	0.2626
P value summary	ns
Do the variances differ signif. (P < 0.05)	No
ANOVA Table	SS	df	MS
Treatment (between columns)	20985	3	6995
Residual (within columns)	16705	32	522
Total	37690	35
Tukey's Multiple Comparison Test	Mean Diff.	q	Significant? P < 0.05?	Summary	95% CI of diff
control vs 10 minute	25.56	3.355	No	ns	-3.646 to 54.76
control vs 15 minute	52.33	6.871	Yes	***	23.13 to 81.53
control vs 20 minute	61.78	8.111	Yes	***	32.58 to 90.98
10 minute vs 15 minute	26.78	3.516	No	ns	-2.424 to 55.98
10 minute vs 20 minute	36.22	4.756	Yes	*	7.021 to 65.42
15 minute vs 20 minute	9.444	1.24	No	ns	-19.76 to 38.65

## Sheet: Fig.6a
Surface hydrophilicity test after NTAPPJ treatment - water abosorbed per g mushroom
		before (g)	after (g)	water amount (g)	water absorbed/g			ANOVA table	SS	DF	MS	F (DFn, DFd)	P value
Control	rep1	0.4231	0.563	0.1399	0.330655			Treatment (between columns)	5.27	3	1.757	F (2.426, 26.69) = 23.61	P<0.0001
	rep2	0.342	0.4704	0.1284	0.375439			Individual (between rows)	1.079	11	0.09812	F (11, 33) = 1.319	P=0.2580
	rep3	0.382	0.5276	0.1456	0.381152			Residual (random)	2.456	33	0.07441
	rep1	0.4428	0.6662	0.2234	0.504517			Total	8.805	47
	rep2	0.3575	0.4661	0.1086	0.303776
	rep3	0.3646	0.48889	0.12429	0.340894			Data summary
	rep1	0.482	0.5537	0.0717	0.148755			Number of treatments (columns)	4
	rep2	0.491	0.591	0.1	0.203666			Number of subjects (rows)	12
	rep3	0.3947	0.589	0.1943	0.492273			Number of missing values	0
	rep1	0.8	1.0987	0.2987	0.373375
	rep2	0.5	0.71	0.21	0.42
	rep3	0.4	0.6	0.2	0.5			Number of families	1
average				0.162074	0.364542			Number of comparisons per family	6
std				0.0642482	0.111049			Alpha	0.05
10 m	rep1	0.3244	0.5407	0.2163	0.666769
	rep2	0.1832	0.3932	0.21	1.14629			Tukey's multiple comparisons test	Mean Diff.	95.00% CI of diff.	Below threshold?	Summary	Adjusted P Value
	rep3	0.1928	0.3994	0.2066	1.07158			control vs. 10 minute	-0.6702	-0.9597 to -0.3808	Yes	***	0.0001	A-B
	rep1	0.3343	0.6551	0.3208	0.959617			control vs. 15 minute	-0.6851	-0.9359 to -0.4343	Yes	****	<0.0001	A-C
	rep2	0.1212	0.2628	0.1416	1.16832			control vs. 20 minute	-0.8727	-1.264 to -0.4812	Yes	***	0.0002	A-D
	rep3	0.2	0.4011	0.2011	1.0055			10 minute vs. 15 minute	-0.01488	-0.3812 to 0.3515	No	ns	0.9993	B-C
	rep1	0.3343	0.6551	0.3208	0.959617			10 minute vs. 20 minute	-0.2025	-0.5372 to 0.1322	No	ns	0.3147	B-D
	rep2	0.1212	0.3	0.1788	1.47525			15 minute vs. 20 minute	-0.1876	-0.5451 to 0.1699	No	ns	0.4278	C-D
	rep3	0.1977	0.4011	0.2034	1.02883
	rep1	0.569	0.7883	0.2193	0.385413			Test details	Mean 1	Mean 2	Mean Diff.	SE of diff.	n1	n2	q	DF
	rep2	0.12	0.3	0.18	1.5			control vs. 10 minute	0.3645	1.035	-0.6702	0.09618	12	12	9.855	11
	rep3	0.2	0.41	0.21	1.05			control vs. 15 minute	0.3645	1.05	-0.6851	0.08334	12	12	11.63	11
average				0.217392	1.03476			control vs. 20 minute	0.3645	1.237	-0.8727	0.1301	12	12	9.488	11
std				0.0528378	0.303254			10 minute vs. 15 minute	1.035	1.05	-0.01488	0.1217	12	12	0.1729	11
15 m	rep1	0.2992	0.4975	0.1983	0.662767			10 minute vs. 20 minute	1.035	1.237	-0.2025	0.1112	12	12	2.575	11
	rep2	0.2958	0.4787	0.1829	0.618323			15 minute vs. 20 minute	1.05	1.237	-0.1876	0.1188	12	12	2.234	11
	rep3	0.1957	0.4302	0.2345	1.19826
	rep1	0.2245	0.4889	0.2644	1.17773
	rep2	0.0998	0.2364	0.1366	1.36874
	rep3	0.2011	0.4502	0.2491	1.23869
	rep1	0.2245	0.4889	0.2644	1.17773
	rep2	0.1	0.2107	0.1107	1.107
	rep3	0.217	0.4572	0.2402	1.10691
	rep1	0.23	0.5	0.27	1.17391
	rep2	0.3681	0.6106	0.2425	0.658788
	rep3	0.217	0.4572	0.2402	1.10691
average				0.219483	1.04965
std				0.0518462	0.253382
20 m	rep1	0.1738	0.3754	0.2016	1.15995
	rep2	0.2097	0.4195	0.2098	1.00048
	rep3	0.2159	0.3882	0.1723	0.798055
	rep1	0.1922	0.411	0.2188	1.1384
	rep2	0.0916	0.2753	0.1837	2.00546
	rep3	0.1987	0.3882	0.1895	0.953699
	rep1	0.1922	0.411	0.2188	1.1384
	rep2	0.0897	0.2753	0.1856	2.06912
	rep3	0.1385	0.2992	0.1607	1.16029
	rep1	0.1922	0.411	0.2188	1.1384
	rep2	0.2843	0.63	0.3457	1.21597
	rep3	0.145	0.3	0.155	1.06897
average				0.205025	1.23726
std				0.0495475	0.390977

## Sheet: Fig.6b
Redox potential test
								ANOVA table	SS	DF	MS	F (DFn, DFd)	P value
	OD 450m	WST+Mg	control	NTAPPJ	PTW			Treatment (between columns)	0.6513	3	0.2171	F (3, 72) = 5.711	P=0.0015
exp 1	rep 1	1.56	1.768	1.22	1.39			Residual (within columns)	2.737	72	0.03801
	rep 2	1.53	1.605	1.33	1.51			Total	3.388	75
	rep 3	1.561	1.36	1.24	1.4
exp 2	rep 1	1.577	1.569	1.2	1.71			Data summary
	rep 2	1.573	1.496	1.214	1.41			Number of treatments (columns)	4
	rep 3	1.561	1.49	1.313	1.42			Number of values (total)	76
exp 3	rep 1	1.577	1.546	1.288	1.6
	rep 2	1.573	1.031	1.4	1.47
	rep 3	1.561	1.187	1.396	1.31			Number of families	1
exp 4	rep 1	1.877	1.569	1.312	1.71			Number of comparisons per family	6
	rep 2	1.873	1.496	1.41	1.41			Alpha	0.05
	rep 3	1.561	1.49	1.333	1.42
	rep 4	1.204	1.121	1.048	1			Tukey's multiple comparisons test	Mean Diff.	95.00% CI of diff.	Below threshold?	Summary
exp 5	rep 1	1.02	1.546	1.088	1.6			WST+Mg vs. control	0.06832	-0.09805 to 0.2347	No	ns		A-B
	rep 2	1.011	1.031	1.002	1			WST+Mg vs. Jet	0.2515	0.08516 to 0.4179	Yes	***		A-C
	rep 3	1.253	1.187	1.16	1.3			WST+Mg vs. PTW	0.08226	-0.08410 to 0.2486	No	ns		A-D
exp 6	rep 1	1.56	1.768	1.22	1.39			control vs. Jet	0.1832	0.01684 to 0.3496	Yes	*		B-C
	rep 2	1.53	1.605	1.33	1.51			control vs. PTW	0.01395	-0.1524 to 0.1803	No	ns		B-D
	rep 3	1.561	1.36	1.24	1.4			Jet vs. PTW	-0.1693	-0.3356 to -0.002896	Yes	*		C-D
	average	1.50121	1.43289	1.24968	1.41895
	std	0.229673	0.225194	0.115664	0.187643			Test details	Mean 1	Mean 2	Mean Diff.	SE of diff.	n1	n2	q	DF
								WST+Mg vs. control	1.501	1.433	0.06832	0.06326	19	19	1.527	72
								WST+Mg vs. Jet	1.501	1.25	0.2515	0.06326	19	19	5.623	72
								WST+Mg vs. PTW	1.501	1.419	0.08226	0.06326	19	19	1.839	72
								control vs. Jet	1.433	1.25	0.1832	0.06326	19	19	4.096	72
								control vs. PTW	1.433	1.419	0.01395	0.06326	19	19	0.3118	72
								Jet vs. PTW	1.25	1.419	-0.1693	0.06326	19	19	3.784	72

## Sheet: Fig.6c
Lipid peroxidation assay - MDA assay
									ANOVA Table	SS	df	MS
		control	NTAPPJ	PTW					Treatment (between columns)	0.07961	2	0.0398
sample OD	rep 1	0.053	0.088	0.082	blank OD	rep 1	0.043		Residual (within columns)	0.01866	15	0.001244
	rep 2	0.064	0.084	0.08		rep 2	0.045		Total	0.09827	17
	rep 3	0.056	0.093	0.089		rep 3	0.05
	rep 1	0.052	0.1	0.083		avg	0.046		Number of families	1
	rep 2	0.061	0.08	0.084					Number of comparisons per family	3
	rep 3	0.054	0.076	0.069					Alpha	0.05
sample-blank	rep 1	0.007	0.042	0.036					Tukey's multiple comparisons test	Mean Diff.	95.00% CI of diff.	Below threshold?	Summary	Adjusted P Value
	rep 2	0.018	0.038	0.034					control vs. jet	-9.457	-14.32 to -4.590	Yes	**	0.0034	A-B
	rep 3	0.01	0.047	0.043					control vs. ptw	-7.68	-10.90 to -4.457	Yes	**	0.0013	A-C
	rep 1	0.006	0.054	0.037					jet vs. ptw	1.776	-1.044 to 4.597	No	ns	0.1956	B-C
	rep 2	0.015	0.034	0.038
	rep 3	0.008	0.03	0.023					Test details	Mean 1	Mean 2	Mean Diff.	SE of diff.	n1	n2	q	DF
									control vs. jet	3.344	12.8	-9.457	1.496	6	6	8.942	5
MDA conc	rep 1	0.0548589	0.329154	0.282132					control vs. ptw	3.344	11.02	-7.68	0.9905	6	6	10.97	5
	rep 2	0.141066	0.297806	0.266458					jet vs. ptw	12.8	11.02	1.776	0.8667	6	6	2.898	5
	rep 3	0.0783699	0.368339	0.336991
	rep 1	0.0470219	0.423197	0.289969
	rep 2	0.117555	0.266458	0.297806
	rep 3	0.0626959	0.23511	0.180251
calculation as protocol	rep 1	2.19436	13.1661	11.2853
	rep 2	5.64263	11.9122	10.6583
	rep 3	3.1348	14.7335	13.4796
	rep 1	1.88088	16.9279	11.5987
	rep 2	4.70219	10.6583	11.9122
	rep 3	2.50784	9.40439	7.21003
Avergae		3.34378	12.8004	11.024
std		1.50557	2.75018	2.09274

## Sheet: Fig.8a
Water loss test - weight variation test on 0,7,12 days
												One-way analysis of variance
												P value	< 0.0001
CONTROL		0DAY	0DAY	7DAY	LOSS (g)	percentage	12 DAY	LOSS (g)	percentage			P value summary	***
	rep 1	2.7628	2.7628	2.7	0.0628	2.32593	2.15	0.6128	28.5023			Are means signif. different? (P < 0.05)	Yes
	rep 2	4.029	4.029	4	0.029	0.725	3.49	0.539	15.4441			Number of groups	6
	rep 3	2.45	2.45	2.19	0.26	11.8721	2.07	0.38	18.3575			F	21.05
avg						4.97436			20.768			R square	0.8977
std						6.02705			6.85471
												ANOVA Table	SS	df	MS
NTAPPJ		0DAY	0DAY	7DAY	LOSS (g)	percentage	12 DAY	LOSS (g)	percentage			Treatment (between columns)	1.333	5	0.2666
	rep 1	3.3035	3.3035	2.75	0.5535	20.1273	2.36	0.9435	39.9788			Residual (within columns)	0.152	12	0.01266
	rep 2	4	4	3.49	0.51	14.6132	3.12	0.88	28.2051			Total	1.485	17
	rep 3	4.23	4.23	3.7	0.53	14.3243	3.3	0.93	28.1818
avg						16.3549			32.1219			Tukey's Multiple Comparison Test	Mean Diff.	q	Significant? P < 0.05?	Summary	95% CI of diff
std						3.27014			6.80428			No treatment vs Jet	-0.4139	6.371	Yes	**	-0.7226 to -0.1052
												No treatment vs PTW	-0.03607	0.5551	No	ns	-0.3447 to 0.2726
PTW		0DAY	0DAY	7DAY	LOSS (g)	percentage	12 DAY	LOSS (g)	percentage			No treatment vs No treatment	-0.3933	6.054	Yes	*	-0.7020 to -0.08466
	rep 1	5.45	5.45	5.31	0.14	2.63653	5.07	0.38	7.49507			No treatment vs Jet	-0.8006	12.32	Yes	***	-1.109 to -0.4919
	rep 2	3.05	3.05	2.99	0.06	2.00669	2.31	0.74	32.0346			No treatment vs PTW	-0.4694	7.225	Yes	**	-0.7781 to -0.1607
	rep 3	5.45	5.45	5.19	0.26	5.00963	4.81	0.64	13.3056			Jet vs PTW	0.3778	5.816	Yes	*	0.06916 to 0.6865
avg						3.21762			17.6118			Jet vs No treatment	0.02057	0.3166	No	ns	-0.2881 to 0.3292
std						1.58356			12.824			Jet vs Jet	-0.3867	5.951	Yes	*	-0.6953 to -0.07800
												Jet vs PTW	-0.0555	0.8542	No	ns	-0.3642 to 0.2532
												PTW vs No treatment	-0.3573	5.499	Yes	*	-0.6659 to -0.04860
												PTW vs Jet	-0.7645	11.77	Yes	***	-1.073 to -0.4558
												PTW vs PTW	-0.4333	6.67	Yes	**	-0.7420 to -0.1247
												No treatment vs Jet	-0.4072	6.268	Yes	**	-0.7159 to -0.09856
												No treatment vs PTW	-0.07607	1.171	No	ns	-0.3847 to 0.2326
												Jet vs PTW	0.3312	5.097	Yes	*	0.02250 to 0.6398

## Sheet: Fig.8b
MDA assay
		Blank	Control	NTAPPJ	PTW			Repeated measures ANOVA summary
0 day	OD	0.043	0.049	0.047	0.051			Assume sphericity?	No
		0.045	0.048	0.049	0.048			F	161.3
		0.05	0.048	0.047	0.048			P value	<0.0001
	avg	0.046	0.0483333	0.0476667	0.049			P value summary	****
								Statistically significant (P < 0.05)?	Yes
	sample-blank		0.003	0.001	0.005			Geisser-Greenhouse's epsilon	0.2445
			0.002	0.003	0.002			R squared	0.9699
			0.002	0.001	0.002
								Was the matching effective?
	MDA CONC.		0.01524	0.00508	0.0254			F	2.46
			0.01016	0.01524	0.01016			P value	0.0492
			0.01016	0.00508	0.01016			P value summary	*
	avg		0.0118533	0.00846667	0.01524			Is there significant matching (P < 0.05)?	Yes
	std		0.00293294	0.00586588	0.00879882			R squared	0.009164
7 day	OD	0.043	0.117	0.124	0.116			ANOVA table	SS	DF	MS	F (DFn, DFd)	P value
		0.045	0.091	0.093	0.1			Treatment (between columns)	2.226	8	0.2782	F (1.956, 9.782) = 161.3	P<0.0001
		0.05	0.112	0.098	0.108			Individual (between rows)	0.02122	5	0.004245	F (5, 40) = 2.460	P=0.0492
	avg	0.046	0.106667	0.105	0.108			Residual (random)	0.069	40	0.001725
								Total	2.316	53
	sample-blank		0.071	0.078	0.07
			0.045	0.047	0.054			Data summary
			0.066	0.052	0.062			Number of treatments (columns)	9
								Number of subjects (rows)	6
	MDA conc.		0.36068	0.39624	0.3556			Number of missing values	0
			0.2286	0.23876	0.27432
			0.33528	0.26416	0.31496
	avg		0.308187	0.29972	0.31496			Number of families	1
	std		0.0700844	0.0845481	0.04064			Number of comparisons per family	36
								Alpha	0.05
12 day		0.043	0.124	0.164	0.145
		0.045	0.107	0.171	0.146			Tukey's multiple comparisons test	Mean Diff.	95.00% CI of diff.	Below threshold?	Summary	Adjusted P Value
		0.05	0.122	0.17	0.147			No treatment vs. Jet	-0.001693	-0.05729 to 0.05390	No	ns	>0.9999	A-B
		0.046	0.117667	0.168333	0.146			No treatment vs. PTW	-0.006858	-0.03074 to 0.01703	No	ns	0.8677	A-C
	sample-blank		0.078	0.118	0.099			No treatment vs. No treatment	-0.287	-0.4080 to -0.1661	Yes	**	0.0011	A-F
			0.061	0.125	0.1			No treatment vs. Jet	-0.2913	-0.4461 to -0.1364	Yes	**	0.0032	A-G
			0.076	0.124	0.101			No treatment vs. PTW	-0.3175	-0.3871 to -0.2479	Yes	****	<0.0001	A-H
								No treatment vs. No treatment	-0.3581	-0.4448 to -0.2715	Yes	****	<0.0001	A-K
	MDA conc.		0.39624	0.59944	0.50292			No treatment vs. Jet	-0.5808	-0.6781 to -0.4836	Yes	****	<0.0001	A-L
			0.30988	0.635	0.508			No treatment vs. PTW	-0.4945	-0.5141 to -0.4748	Yes	****	<0.0001	A-M
			0.38608	0.62992	0.51308			Jet vs. PTW	-0.005165	-0.08026 to 0.06993	No	ns	>0.9999	B-C
	avg		0.364067	0.621453	0.508			Jet vs. No treatment	-0.2853	-0.4246 to -0.1461	Yes	**	0.0022	B-F
	std		0.0472012	0.0192326	0.00508			Jet vs. Jet	-0.2896	-0.4527 to -0.1264	Yes	**	0.0042	B-G
								Jet vs. PTW	-0.3158	-0.4266 to -0.2050	Yes	***	0.0005	B-H
								Jet vs. No treatment	-0.3564	-0.4866 to -0.2263	Yes	***	0.0005	B-K
								Jet vs. Jet	-0.5791	-0.6801 to -0.4782	Yes	****	<0.0001	B-L
								Jet vs. PTW	-0.4928	-0.5391 to -0.4464	Yes	****	<0.0001	B-M
								PTW vs. No treatment	-0.2802	-0.3949 to -0.1654	Yes	***	0.0009	C-F
								PTW vs. Jet	-0.2844	-0.4305 to -0.1383	Yes	**	0.0027	C-G
								PTW vs. PTW	-0.3106	-0.3621 to -0.2592	Yes	****	<0.0001	C-H
								PTW vs. No treatment	-0.3513	-0.4198 to -0.2827	Yes	****	<0.0001	C-K
								PTW vs. Jet	-0.574	-0.6913 to -0.4566	Yes	****	<0.0001	C-L
								PTW vs. PTW	-0.4876	-0.5247 to -0.4505	Yes	****	<0.0001	C-M
								No treatment vs. Jet	-0.004233	-0.08634 to 0.07787	No	ns	>0.9999	F-G
								No treatment vs. PTW	-0.03048	-0.1362 to 0.07526	No	ns	0.8657	F-H
								No treatment vs. No treatment	-0.07112	-0.1550 to 0.01280	No	ns	0.0931	F-K
								No treatment vs. Jet	-0.2938	-0.4815 to -0.1061	Yes	**	0.0075	F-L
								No treatment vs. PTW	-0.2074	-0.3233 to -0.09156	Yes	**	0.004	F-M
								Jet vs. PTW	-0.02625	-0.1600 to 0.1075	No	ns	0.9773	G-H
								Jet vs. No treatment	-0.06689	-0.1959 to 0.06215	No	ns	0.3939	G-K
								Jet vs. Jet	-0.2896	-0.5204 to -0.05873	Yes	*	0.0197	G-L
								Jet vs. PTW	-0.2032	-0.3551 to -0.05128	Yes	*	0.015	G-M
								PTW vs. No treatment	-0.04064	-0.08201 to 0.0007252	No	ns	0.0536	H-K
								PTW vs. Jet	-0.2633	-0.4198 to -0.1068	Yes	**	0.0054	H-L
								PTW vs. PTW	-0.177	-0.2586 to -0.09533	Yes	**	0.0016	H-M
								No treatment vs. Jet	-0.2227	-0.3915 to -0.05383	Yes	*	0.0159	K-L
								No treatment vs. PTW	-0.1363	-0.2293 to -0.04330	Yes	*	0.01	K-M
								Jet vs. PTW	0.08636	-0.01157 to 0.1843	No	ns	0.0806	L-M
								Test details	Mean 1	Mean 2	Mean Diff.	SE of diff.	n1	n2	q	DF
								No treatment vs. Jet	0.02032	0.02201	-0.001693	0.01156	6	6	0.2072	5
								No treatment vs. PTW	0.02032	0.02718	-0.006858	0.004967	6	6	1.953	5
								No treatment vs. No treatment	0.02032	0.3073	-0.287	0.02515	6	6	16.14	5
								No treatment vs. Jet	0.02032	0.3116	-0.2913	0.0322	6	6	12.79	5
								No treatment vs. PTW	0.02032	0.3378	-0.3175	0.01447	6	6	31.02	5
								No treatment vs. No treatment	0.02032	0.3785	-0.3581	0.01802	6	6	28.11	5
								No treatment vs. Jet	0.02032	0.6011	-0.5808	0.02022	6	6	40.62	5
								No treatment vs. PTW	0.02032	0.5148	-0.4945	0.004078	6	6	171.5	5
								Jet vs. PTW	0.02201	0.02718	-0.005165	0.01561	6	6	0.4678	5
								Jet vs. No treatment	0.02201	0.3073	-0.2853	0.02896	6	6	13.93	5
								Jet vs. Jet	0.02201	0.3116	-0.2896	0.03393	6	6	12.07	5
								Jet vs. PTW	0.02201	0.3378	-0.3158	0.02303	6	6	19.39	5
								Jet vs. No treatment	0.02201	0.3785	-0.3564	0.02705	6	6	18.63	5
								Jet vs. Jet	0.02201	0.6011	-0.5791	0.02099	6	6	39.03	5
								Jet vs. PTW	0.02201	0.5148	-0.4928	0.009639	6	6	72.3	5
								PTW vs. No treatment	0.02718	0.3073	-0.2802	0.02386	6	6	16.6	5
								PTW vs. Jet	0.02718	0.3116	-0.2844	0.03038	6	6	13.24	5
								PTW vs. PTW	0.02718	0.3378	-0.3106	0.0107	6	6	41.06	5
								PTW vs. No treatment	0.02718	0.3785	-0.3513	0.01426	6	6	34.85	5
								PTW vs. Jet	0.02718	0.6011	-0.574	0.02441	6	6	33.26	5
								PTW vs. PTW	0.02718	0.5148	-0.4876	0.007716	6	6	89.37	5
								No treatment vs. Jet	0.3073	0.3116	-0.004233	0.01707	6	6	0.3507	5
								No treatment vs. PTW	0.3073	0.3378	-0.03048	0.02199	6	6	1.96	5
								No treatment vs. No treatment	0.3073	0.3785	-0.07112	0.01745	6	6	5.764	5
								No treatment vs. Jet	0.3073	0.6011	-0.2938	0.03903	6	6	10.65	5
								No treatment vs. PTW	0.3073	0.5148	-0.2074	0.02409	6	6	12.18	5
								Jet vs. PTW	0.3116	0.3378	-0.02625	0.02781	6	6	1.335	5
								Jet vs. No treatment	0.3116	0.3785	-0.06689	0.02683	6	6	3.526	5
								Jet vs. Jet	0.3116	0.6011	-0.2896	0.048	6	6	8.532	5
								Jet vs. PTW	0.3116	0.5148	-0.2032	0.03159	6	6	9.097	5
								PTW vs. No treatment	0.3378	0.3785	-0.04064	0.008601	6	6	6.682	5
								PTW vs. Jet	0.3378	0.6011	-0.2633	0.03254	6	6	11.44	5
								PTW vs. PTW	0.3378	0.5148	-0.177	0.01697	6	6	14.75	5
								No treatment vs. Jet	0.3785	0.6011	-0.2227	0.03511	6	6	8.97	5
								No treatment vs. PTW	0.3785	0.5148	-0.1363	0.01934	6	6	9.968	5
								Jet vs. PTW	0.6011	0.5148	0.08636	0.02036	6	6	5.998	5

## Sheet: Fig.8c
Antioxidant activity assay
								ANOVA table	SS	DF	MS	F (DFn, DFd)	P value
0 day		Blank	Control	Jet	Ptw			Treatment (between columns)	895.3	8	111.9	F (8, 27) = 11.83	P<0.0001
	rep 1	0.152	0.066	0.057	0.079			Residual (within columns)	255.4	27	9.458
	rep 2	0.164	0.07	0.059	0.069			Total	1151	35
	rep 3	0.171	0.071	0.059	0.066
	rep 4	0.159	0.067	0.052	0.069			Data summary
	rep 5	0.165	0.06	0.054	0.071			Number of treatments (columns)	9
	rep 6	0.148	0.057	0.055	0.07			Number of values (total)	36
percent inhibition calculation								Number of families	1
	rep 1		56.5789	62.5	48.0263			Number of comparisons per family	36
	rep 2		57.3171	64.0244	57.9268			Alpha	0.05
	rep 3		58.4795	65.4971	61.4035
	rep 4		57.8616	67.2956	56.6038			Tukey's multiple comparisons test	Mean Diff.	95.00% CI of diff.	Below threshold?	Summary	Adjusted P Value
	rep 5		63.6364	67.2727	56.9697			No treatment vs. Jet	-5.678	-11.65 to 0.2965	No	ns	0.0721	A-B
	rep 6		61.4865	62.8378	52.7027			No treatment vs. PTW	3.621	-2.353 to 9.596	No	ns	0.5314	A-C
	avg		59.2267	64.9046	55.6055			No treatment vs. No treatment	12.65	5.336 to 19.97	Yes	***	0.0001	A-F
	std		2.74338	2.12152	4.64184			No treatment vs. Jet	-4.355	-11.67 to 2.962	No	ns	0.5545	A-G
								No treatment vs. PTW	-4.86	-12.18 to 2.457	No	ns	0.4131	A-H
7 day								No treatment vs. No treatment	-1.072	-8.389 to 6.245	No	ns	0.9999	A-K
		Blank	Control	Jet	Ptw			No treatment vs. Jet	1.141	-6.176 to 8.458	No	ns	0.9998	A-L
	rep 1	0.712	0.388	0.266	0.247			No treatment vs. PTW	-1.75	-9.068 to 5.567	No	ns	0.9957	A-M
	rep 2	0.782	0.459	0.29	0.302			Jet vs. PTW	9.299	3.325 to 15.27	Yes	***	0.0005	B-C
	rep 3	0.79	0.372	0.275	0.272			Jet vs. No treatment	18.33	11.01 to 25.65	Yes	****	<0.0001	B-F
								Jet vs. Jet	1.323	-5.994 to 8.640	No	ns	0.9994	B-G
Percent Inhibition calculation								Jet vs. PTW	0.818	-6.499 to 8.135	No	ns	>0.9999	B-H
	rep 1		45.5056	62.6404	65.309			Jet vs. No treatment	4.606	-2.711 to 11.92	No	ns	0.4826	B-K
	rep 2		41.3043	62.9156	61.3811			Jet vs. Jet	6.819	-0.4985 to 14.14	No	ns	0.0823	B-L
	rep 3		52.9114	65.1899	65.5696			Jet vs. PTW	3.927	-3.390 to 11.24	No	ns	0.6781	B-M
	avg		46.5738	63.582	64.0866			PTW vs. No treatment	9.032	1.715 to 16.35	Yes	**	0.0077	C-F
	std		5.87679	1.39926	2.34664			PTW vs. Jet	-7.977	-15.29 to -0.6594	Yes	*	0.0249	C-G
								PTW vs. PTW	-8.481	-15.80 to -1.164	Yes	*	0.0143	C-H
12 day								PTW vs. No treatment	-4.693	-12.01 to 2.624	No	ns	0.4583	C-K
		Blank	Control	Jet	Ptw			PTW vs. Jet	-2.481	-9.798 to 4.837	No	ns	0.9621	C-L
	rep 1	0.712	0.29	0.301	0.281			PTW vs. PTW	-5.372	-12.69 to 1.945	No	ns	0.2894	C-M
	rep 2	0.782	0.308	0.331	0.299			No treatment vs. Jet	-17.01	-25.46 to -8.559	Yes	****	<0.0001	F-G
	rep 3	0.79	0.308	0.325	0.311			No treatment vs. PTW	-17.51	-25.96 to -9.064	Yes	****	<0.0001	F-H
								No treatment vs. No treatment	-13.72	-22.17 to -5.276	Yes	***	0.0003	F-K
Percent Inhibition calculation								No treatment vs. Jet	-11.51	-19.96 to -3.063	Yes	**	0.0026	F-L
	rep 1		59.2697	57.7247	60.5337			No treatment vs. PTW	-14.4	-22.85 to -5.954	Yes	***	0.0001	F-M
	rep 2		60.6138	57.6726	61.7647			Jet vs. PTW	-0.5046	-8.954 to 7.944	No	ns	>0.9999	G-H
	rep 3		61.0127	58.8608	60.6329			Jet vs. No treatment	3.283	-5.166 to 11.73	No	ns	0.9204	G-K
	avg		60.2987	58.086	60.9771			Jet vs. Jet	5.496	-2.953 to 13.94	No	ns	0.44	G-L
	std		0.913222	0.671434	0.683881			Jet vs. PTW	2.605	-5.844 to 11.05	No	ns	0.9783	G-M
								PTW vs. No treatment	3.788	-4.661 to 12.24	No	ns	0.842	H-K
								PTW vs. Jet	6.001	-2.449 to 14.45	No	ns	0.3288	H-L
								PTW vs. PTW	3.109	-5.340 to 11.56	No	ns	0.9402	H-M
								No treatment vs. Jet	2.213	-6.236 to 10.66	No	ns	0.9922	K-L
								No treatment vs. PTW	-0.6784	-9.127 to 7.771	No	ns	>0.9999	K-M
								Jet vs. PTW	-2.891	-11.34 to 5.558	No	ns	0.96	L-M
								Test details	Mean 1	Mean 2	Mean Diff.	SE of diff.	n1	n2	q	DF
								No treatment vs. Jet	59.23	64.9	-5.678	1.776	6	6	4.522	27
								No treatment vs. PTW	59.23	55.61	3.621	1.776	6	6	2.884	27
								No treatment vs. No treatment	59.23	46.57	12.65	2.175	6	3	8.228	27
								No treatment vs. Jet	59.23	63.58	-4.355	2.175	6	3	2.832	27
								No treatment vs. PTW	59.23	64.09	-4.86	2.175	6	3	3.16	27
								No treatment vs. No treatment	59.23	60.3	-1.072	2.175	6	3	0.6972	27
								No treatment vs. Jet	59.23	58.09	1.141	2.175	6	3	0.7418	27
								No treatment vs. PTW	59.23	60.98	-1.75	2.175	6	3	1.138	27
								Jet vs. PTW	64.9	55.61	9.299	1.776	6	6	7.406	27
								Jet vs. No treatment	64.9	46.57	18.33	2.175	6	3	11.92	27
								Jet vs. Jet	64.9	63.58	1.323	2.175	6	3	0.8601	27
								Jet vs. PTW	64.9	64.09	0.818	2.175	6	3	0.532	27
								Jet vs. No treatment	64.9	60.3	4.606	2.175	6	3	2.995	27
								Jet vs. Jet	64.9	58.09	6.819	2.175	6	3	4.434	27
								Jet vs. PTW	64.9	60.98	3.927	2.175	6	3	2.554	27
								PTW vs. No treatment	55.61	46.57	9.032	2.175	6	3	5.873	27
								PTW vs. Jet	55.61	63.58	-7.977	2.175	6	3	5.187	27
								PTW vs. PTW	55.61	64.09	-8.481	2.175	6	3	5.515	27
								PTW vs. No treatment	55.61	60.3	-4.693	2.175	6	3	3.052	27
								PTW vs. Jet	55.61	58.09	-2.481	2.175	6	3	1.613	27
								PTW vs. PTW	55.61	60.98	-5.372	2.175	6	3	3.493	27
								No treatment vs. Jet	46.57	63.58	-17.01	2.511	3	3	9.579	27
								No treatment vs. PTW	46.57	64.09	-17.51	2.511	3	3	9.863	27
								No treatment vs. No treatment	46.57	60.3	-13.72	2.511	3	3	7.73	27
								No treatment vs. Jet	46.57	58.09	-11.51	2.511	3	3	6.484	27
								No treatment vs. PTW	46.57	60.98	-14.4	2.511	3	3	8.112	27
								Jet vs. PTW	63.58	64.09	-0.5046	2.511	3	3	0.2842	27
								Jet vs. No treatment	63.58	60.3	3.283	2.511	3	3	1.849	27
								Jet vs. Jet	63.58	58.09	5.496	2.511	3	3	3.095	27
								Jet vs. PTW	63.58	60.98	2.605	2.511	3	3	1.467	27
								PTW vs. No treatment	64.09	60.3	3.788	2.511	3	3	2.133	27
								PTW vs. Jet	64.09	58.09	6.001	2.511	3	3	3.379	27
								PTW vs. PTW	64.09	60.98	3.109	2.511	3	3	1.751	27
								No treatment vs. Jet	60.3	58.09	2.213	2.511	3	3	1.246	27
								No treatment vs. PTW	60.3	60.98	-0.6784	2.511	3	3	0.3821	27
								Jet vs. PTW	58.09	60.98	-2.891	2.511	3	3	1.628	27

## Sheet: Fig.8d
pH of mushroom
	0 day					7 day					12 day
pH value	control	NTAPPJ	PTW			control	NTAPPJ	PTW			control	NTAPPJ	PTW
	7.42	6.5	6.53			6.65	6.61	6.48			6.96	6.81	6.03
	7.3	6.68	6.54			7	6.67	6.3			6.99	6.91	6
	6.67	6.55	6.09			7.1	6.51	6.1			6.87	6.77	5.91
	7	6.3	6.19			6.5	6.1	6.4			6.99	6.91	6
	7.3	6.68	6.54			7	6.67	6.3			6.87	6.77	5.91
	6.67	6.55	6.09			6.9	6.4	6.39			6.7	6.54	5.29
avg	7.06	6.54333	6.33			6.85833	6.49333	6.32833			6.89667	6.785	5.85667
std	0.332445	0.14038	0.229347			0.233274	0.218967	0.130907			0.110935	0.135904	0.282111
Table Analyzed	Data 1
One-way analysis of variance
P value	< 0.0001
P value summary	***
Are means signif. different? (P < 0.05)	Yes
Number of groups	9
F	10.34
R square	0.8212
ANOVA Table	SS	df	MS
Treatment (between columns)	3.202	8	0.4002
Residual (within columns)	0.6969	18	0.03872
Total	3.899	26
Tukey's Multiple Comparison Test	Mean Diff.	q	Significant? P < 0.05?	Summary	95% CI of diff
No treatment vs Jet	0.5533	4.871	No	ns	-0.009695 to 1.116
No treatment vs PTW	0.7433	6.543	Yes	**	0.1803 to 1.306
No treatment vs No treatment	0.2133	1.878	No	ns	-0.3497 to 0.7764
No treatment vs Jet	0.5333	4.695	No	ns	-0.02969 to 1.096
No treatment vs PTW	0.8367	7.365	Yes	**	0.2736 to 1.400
No treatment vs No treatment	0.19	1.672	No	ns	-0.3730 to 0.7530
No treatment vs Jet	0.3	2.641	No	ns	-0.2630 to 0.8630
No treatment vs PTW	1.15	10.12	Yes	***	0.5870 to 1.713
Jet vs PTW	0.19	1.672	No	ns	-0.3730 to 0.7530
Jet vs No treatment	-0.34	2.993	No	ns	-0.9030 to 0.2230
Jet vs Jet	-0.02	0.176	No	ns	-0.5830 to 0.5430
Jet vs PTW	0.2833	2.494	No	ns	-0.2797 to 0.8464
Jet vs No treatment	-0.3633	3.198	No	ns	-0.9264 to 0.1997
Jet vs Jet	-0.2533	2.23	No	ns	-0.8164 to 0.3097
Jet vs PTW	0.5967	5.252	Yes	*	0.03364 to 1.160
PTW vs No treatment	-0.53	4.665	No	ns	-1.093 to 0.03303
PTW vs Jet	-0.21	1.849	No	ns	-0.7730 to 0.3530
PTW vs PTW	0.09333	0.8216	No	ns	-0.4697 to 0.6564
PTW vs No treatment	-0.5533	4.871	No	ns	-1.116 to 0.009695
PTW vs Jet	-0.4433	3.902	No	ns	-1.006 to 0.1197
PTW vs PTW	0.4067	3.58	No	ns	-0.1564 to 0.9697
No treatment vs Jet	0.32	2.817	No	ns	-0.2430 to 0.8830
No treatment vs PTW	0.6233	5.487	Yes	*	0.06030 to 1.186
No treatment vs No treatment	-0.02333	0.2054	No	ns	-0.5864 to 0.5397
No treatment vs Jet	0.08667	0.7629	No	ns	-0.4764 to 0.6497
No treatment vs PTW	0.9367	8.245	Yes	***	0.3736 to 1.500
Jet vs PTW	0.3033	2.67	No	ns	-0.2597 to 0.8664
Jet vs No treatment	-0.3433	3.022	No	ns	-0.9064 to 0.2197
Jet vs Jet	-0.2333	2.054	No	ns	-0.7964 to 0.3297
Jet vs PTW	0.6167	5.428	Yes	*	0.05364 to 1.180
PTW vs No treatment	-0.6467	5.692	Yes	*	-1.210 to -0.08364
PTW vs Jet	-0.5367	4.724	No	ns	-1.100 to 0.02636
PTW vs PTW	0.3133	2.758	No	ns	-0.2497 to 0.8764
No treatment vs Jet	0.11	0.9683	No	ns	-0.4530 to 0.6730
No treatment vs PTW	0.96	8.45	Yes	***	0.3970 to 1.523
Jet vs PTW	0.85	7.482	Yes	**	0.2870 to 1.413
